# Supplementary material
Source: PubMed Central journal article supplement (PMC8263652)
Supplement: ajcr0011-3002-f6.pdf [file ajcr0011-3002-f6.pdf]

## Screening and diagnosis of colorectal cancer and advanced adenoma

**Table S1.** The list of N-glycans in human serum used for quantitation

| No  | Putative structure | MW (M+Na) <sup>+</sup> |                           | composition | CV     |
|-----|--------------------|------------------------|---------------------------|-------------|--------|
|     |                    | Sample (light)         | Internal Standard (heavy) |             |        |
| G1  |                    | 1257.44                | 1260.45                   | H5N2        | 17.40% |
| G2  |                    | 1282.47                | 1285.48                   | H3N3F1      | 20.98% |
| G3  |                    | 1298.46                | 1301.49                   | H4N3        | 17.48% |
| G4  |                    | 1419.48                | 1422.49                   | H6N2        | 20.74% |
| G5  |                    | 1444.52                | 1447.55                   | H4N3F1      | 23.88% |
| G6  |                    | 1455.53                | 1458.54                   | H3N3E1      | 18.36% |
| G7  |                    | 1485.55                | 1488.57                   | H3N4F1      | 7.78%  |
| G8  |                    | 1501.53                | 1504.55                   | H4N4        | 19.33% |
| G9  |                    | 1617.60                | 1620.61                   | H4N3E1      | 7.04%  |
| G10 |                    | 1647.61                | 1650.63                   | H4N4F1      | 8.82%  |
| G11 |                    | 1663.59                | 1666.61                   | H5N4        | 15.91% |
| G12 |                    | 1688.62                | 1691.66                   | H3N5F1      | 16.16% |
| G13 |                    | 1779.70                | 1782.70                   | H5N3E1      | 22.10% |
| G14 |                    | 1809.67                | 1812.69                   | H5N4F1      | 8.87%  |
| G15 |                    | 1820.70                | 1823.70                   | H4N4E1      | 9.29%  |
| G16 |                    | 1850.69                | 1853.69                   | H4N5F1      | 13.96% |
| G17 |                    | 1905.64                | 1908.68                   | H9N2        | 23.73% |
| G18 |                    | 1936.69                | 1939.74                   | H5N4L1      | 10.32% |
| G19 |                    | 1966.74                | 1969.75                   | H4N4F1E1    | 6.70%  |
| G20 |                    | 1982.73                | 1985.76                   | H5N4E1      | 3.87%  |
| G21 |                    | 2012.75                | 2015.76                   | H5N5F1      | 16.32% |
| G22 |                    | 2128.78                | 2131.80                   | H5N4F1E1    | 5.72%  |
| G23 |                    | 2185.78                | 2188.79                   | H5N5E1      | 10.22% |
| G24 |                    | 2209.74                | 2212.79                   | H5N4L2      | 11.90% |

## Screening and diagnosis of colorectal cancer and advanced adenoma

|     |                                                                                     |         |         |            |        |
|-----|-------------------------------------------------------------------------------------|---------|---------|------------|--------|
| G25 |    | 2255.81 | 2258.83 | H5N4L1E1   | 4.09%  |
| G26 |    | 2301.85 | 2304.88 | H5N4E2     | 2.20%  |
| G27 |    | 2331.84 | 2334.86 | H5N5F1E1   | 7.18%  |
| G28 |    | 2347.83 | 2350.84 | H6N5E1     | 10.85% |
| G29 |    | 2401.83 | 2404.86 | H5N4F1L1E1 | 7.09%  |
| G30 |    | 2429.86 | 2432.86 | H4N7E1     | 15.72% |
| G31 |    | 2447.88 | 2450.90 | H5N4F1E2   | 5.09%  |
| G32 |    | 2493.86 | 2496.93 | H6N5F1E1   | 18.03% |
| G33 |    | 2504.88 | 2507.89 | H5N5E2     | 13.46% |
| G34 |    | 2574.80 | 2577.83 | H6N5L2     | 17.64% |
| G35 |   | 2620.90 | 2623.91 | H6N5L1E1   | 5.91%  |
| G36 |  | 2650.95 | 2653.97 | H5N5F1E2   | 7.49%  |
| G37 |  | 2666.93 | 2669.96 | H6N5E2     | 8.16%  |
| G38 |  | 2766.94 | 2769.95 | H6N5F1L1E1 | 11.02% |
| G39 |  | 2813.09 | 2816.11 | H6N5F1E2   | 16.75% |
| G40 |  | 2893.96 | 2897.01 | H6N5L2E1   | 8.91%  |
| G41 |  | 2940.05 | 2943.06 | H6N5L1E2   | 4.06%  |
| G42 |  | 2986.07 | 2989.08 | H6N5E3     | 5.24%  |
| G43 |  | 3040.03 | 2043.07 | H6N5F1L2E1 | 16.93% |
| G44 |  | 3068.16 | 3071.20 | H5N5L1E1   | 21.48% |
| G45 |  | 3086.09 | 3089.11 | H6N5F1L1E2 | 5.21%  |
| G46 |  | 3259.12 | 3262.18 | H7N6L2E1   | 21.26% |
| G47 |  | 3305.23 | 3308.20 | H7N6L1E2   | 22.81% |

## Screening and diagnosis of colorectal cancer and advanced adenoma

|     |                                                                                   |         |         |          |        |
|-----|-----------------------------------------------------------------------------------|---------|---------|----------|--------|
| G48 |  | 3532.34 | 3535.34 | H7N6L3E1 | 23.57% |
| G49 |  | 3578.28 | 3581.30 | H7N6L2E2 | 22.38% |

H = hexose, N = N-acetylhexosamine, F = fucose, L = lactonized N-acetylneuraminic acid ( $\alpha$ 2,3-linked), E = ethyl esterified N-acetylneuraminic acid ( $\alpha$ 2,6-linked), the number of residues given listed the letter. Green circle, Man; yellow circle, Gal; blue square, GlcNAc; red triangle, Fuc; clockwise purple diamond,  $\alpha$ (2,6)-linked sialic acid; anticlockwise purple diamond,  $\alpha$ (2,3)-linked sialic acid.

**Table S2.** Derived trait calculation

| Derived glycosylation trait | Formula                                                                                                                   |
|-----------------------------|---------------------------------------------------------------------------------------------------------------------------|
| Fucosylation                | $G2+G5+G7+G10+G12+G14+G16+G19+G21+G22+G27+G29+G31+G36$                                                                    |
| High mannose glycans        | $G1+G14+G17$                                                                                                              |
| Bisection                   | $G12+G16+G21+G23+G27+G30+G33+G36$                                                                                         |
| Monoantennary glycans       | $G2+G3+G5+G9$                                                                                                             |
| Diantennary glycans         | $G7+G8+G10+G11+G12+G14+G15+G16+G18+G19+G20+G21+G22+G23+G24+G25+G26+G27+G29+G31+G33+G36$                                   |
| Triantennary glycans        | $G28+G34+G35+G37+G38+G39+G40+G41+G42+G43+G44+G45$                                                                         |
| Tetraantennary glycans      | $G30+G46+G47+G49$                                                                                                         |
| Multi-antennary glycans     | $G28+G34+G35+G37+G38+G39+G40+G41+G42+G43+G44+G45+G30+G46+G47+G49$                                                         |
| Lewis type glycans          | $G32+G38+G39+G43+G45$                                                                                                     |
| $\alpha$ 2,3-sialylation    | $1/2*(G18+G25+G29)+1/3*(G35+G38+G41+G44+G45)+2/3*(G34+G40+G43)+1/4*G47+2/4*(G46+G49)+G24$                                 |
| $\alpha$ 2,6-sialylation    | $1/2*(G15+G19+G20+G22+G25+G29)+1/3*(G28+G32+G35+G38+G40+G43+G44)+2/3*(G37+G39+G41+G45)+1/4*G46+2/4*(G47+G49)+G26+G31+G42$ |

## Screening and diagnosis of colorectal cancer and advanced adenoma

**Table S3.** Relative quantitative data of the 49 N-glycans of 186 samples in the training cohort

| No | Putative structure                                                                  | m/z     | Composition | Peak area ratio (Mean $\pm$ SD) |      |      |      |      |      | CRC vs Healthy Control |      | AA vs Healthy Control |      | AA vs CRC |      |
|----|-------------------------------------------------------------------------------------|---------|-------------|---------------------------------|------|------|------|------|------|------------------------|------|-----------------------|------|-----------|------|
|    |                                                                                     |         |             | Healthy Control                 |      | AA   |      | CRC  |      | P value                | AUC  | P value               | AUC  | P value   | AUC  |
|    |                                                                                     |         |             | Mean                            | SD   | Mean | SD   | Mean | SD   |                        |      |                       |      |           |      |
| 1  |    | 1257.44 | H5N2        | 2.22                            | 0.76 | 1.59 | 0.48 | 1.84 | 0.88 | 0.0026                 | 0.67 | 8.11E-05              | 0.75 | 0.0554    | 0.61 |
| 2  |    | 1282.47 | H3N3F1      | 2.96                            | 0.95 | 2.20 | 0.83 | 2.57 | 1.02 | 0.0264                 | 0.63 | 0.0001                | 0.75 | 0.0443    | 0.62 |
| 3  |    | 1298.46 | H4N3        | 1.80                            | 0.50 | 1.33 | 0.31 | 1.67 | 0.52 | 0.2604                 | 0.57 | 1.92E-06              | 0.81 | 9.75E-05  | 0.73 |
| 4  |    | 1419.48 | H6N2        | 2.27                            | 0.86 | 1.89 | 0.65 | 2.26 | 0.73 | 0.9156                 | 0.51 | 0.0210                | 0.65 | 0.0102    | 0.65 |
| 5  |    | 1444.52 | H4N3F1      | 2.46                            | 0.74 | 1.71 | 0.45 | 1.71 | 0.64 | 3.84E-09               | 0.81 | 7.67E-07              | 0.82 | 0.3866    | 0.55 |
| 6  |    | 1455.53 | H3N3E1      | 1.42                            | 0.40 | 1.10 | 0.30 | 1.51 | 0.61 | 0.8451                 | 0.52 | 0.0002                | 0.74 | 8.23E-05  | 0.73 |
| 7  |    | 1485.55 | H3N4F1      | 2.00                            | 0.87 | 1.51 | 0.93 | 2.16 | 1.21 | 0.7449                 | 0.53 | 0.0031                | 0.69 | 0.0017    | 0.68 |
| 8  |    | 1501.53 | H4N4        | 2.08                            | 1.10 | 1.28 | 0.35 | 1.64 | 0.82 | 0.0086                 | 0.65 | 1.05E-06              | 0.82 | 0.0079    | 0.65 |
| 9  |    | 1617.60 | H4N3E1      | 1.56                            | 0.34 | 1.21 | 0.19 | 1.65 | 0.50 | 0.5091                 | 0.55 | 1.05E-06              | 0.82 | 2.89E-07  | 0.82 |
| 10 |    | 1647.61 | H4N4F1      | 1.59                            | 0.50 | 1.11 | 0.42 | 1.27 | 0.49 | 0.0023                 | 0.67 | 1.03E-05              | 0.78 | 0.0727    | 0.60 |
| 11 |   | 1663.59 | H5N4        | 1.71                            | 0.65 | 1.13 | 0.31 | 1.24 | 0.42 | 8.65E-06               | 0.75 | 5.12E-07              | 0.83 | 0.1977    | 0.57 |
| 12 |  | 1688.62 | H3N5F1      | 2.57                            | 0.99 | 2.22 | 1.22 | 2.65 | 1.38 | 0.8886                 | 0.51 | 0.0311                | 0.64 | 0.0438    | 0.62 |
| 13 |  | 1779.70 | H5N3E1      | 1.77                            | 0.29 | 1.56 | 0.34 | 1.76 | 0.43 | 0.7433                 | 0.53 | 0.0053                | 0.68 | 0.0280    | 0.63 |
| 14 |  | 1809.67 | H5N4F1      | 1.32                            | 0.46 | 0.85 | 0.31 | 0.78 | 0.32 | 3.90E-11               | 0.85 | 1.75E-06              | 0.81 | 0.2727    | 0.56 |
| 15 |  | 1820.70 | H4N4E1      | 0.60                            | 0.13 | 0.46 | 0.08 | 0.60 | 0.15 | 0.9223                 | 0.51 | 3.47E-07              | 0.85 | 8.94E-07  | 0.80 |
| 16 |  | 1850.69 | H4N5F1      | 1.91                            | 0.57 | 1.50 | 0.53 | 1.73 | 0.65 | 0.1035                 | 0.60 | 0.0014                | 0.70 | 0.0769    | 0.60 |

## Screening and diagnosis of colorectal cancer and advanced adenoma

|    |                                                                                     |         |            |      |      |      |      |      |      |          |      |          |      |          |      |
|----|-------------------------------------------------------------------------------------|---------|------------|------|------|------|------|------|------|----------|------|----------|------|----------|------|
| 17 | 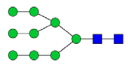   | 1905.64 | H9N2       | 2.39 | 0.62 | 2.60 | 0.72 | 2.64 | 0.72 | 0.0965   | 0.60 | 0.2172   | 0.58 | 0.7838   | 0.49 |
| 18 |    | 1936.69 | H5N4L1     | 0.71 | 0.19 | 0.56 | 0.12 | 0.78 | 0.27 | 0.1619   | 0.58 | 8.11E-05 | 0.75 | 2.88E-06 | 0.78 |
| 19 |    | 1966.74 | H4N4F1E1   | 1.94 | 0.39 | 1.52 | 0.28 | 1.92 | 0.47 | 0.9223   | 0.51 | 1.75E-06 | 0.81 | 2.70E-06 | 0.78 |
| 20 |    | 1982.73 | H5N4E1     | 1.07 | 0.20 | 0.85 | 0.12 | 1.11 | 0.29 | 0.5944   | 0.54 | 5.12E-07 | 0.83 | 2.89E-07 | 0.82 |
| 21 |    | 2012.75 | H5N5F1     | 1.18 | 0.21 | 1.02 | 0.23 | 1.14 | 0.25 | 0.5300   | 0.54 | 0.0019   | 0.70 | 0.0078   | 0.66 |
| 22 |    | 2128.78 | H5N4F1E1   | 1.17 | 0.29 | 0.83 | 0.22 | 0.93 | 0.28 | 8.83E-06 | 0.74 | 5.12E-07 | 0.83 | 0.0632   | 0.61 |
| 23 |    | 2185.78 | H5N5E1     | 1.88 | 0.55 | 1.41 | 0.33 | 1.82 | 0.57 | 0.8886   | 0.49 | 8.33E-06 | 0.79 | 2.91E-05 | 0.75 |
| 24 |    | 2209.74 | H5N4L2     | 0.99 | 0.20 | 0.84 | 0.14 | 1.03 | 0.26 | 0.5091   | 0.55 | 0.0002   | 0.74 | 2.44E-05 | 0.75 |
| 25 |    | 2255.81 | H5N4L1E1   | 1.07 | 0.21 | 0.89 | 0.15 | 1.14 | 0.32 | 0.2604   | 0.57 | 0.0001   | 0.75 | 1.36E-05 | 0.76 |
| 26 |    | 2301.85 | H5N4E2     | 1.30 | 0.19 | 1.12 | 0.13 | 1.38 | 0.29 | 0.1493   | 0.59 | 1.18E-05 | 0.78 | 2.89E-07 | 0.81 |
| 27 |    | 2331.84 | H5N5F1E1   | 1.68 | 0.55 | 1.36 | 0.42 | 1.65 | 0.53 | 0.9256   | 0.50 | 0.0053   | 0.68 | 0.0040   | 0.67 |
| 28 |   | 2347.83 | H6N5E1     | 1.51 | 0.36 | 1.26 | 0.34 | 1.65 | 0.52 | 0.3158   | 0.56 | 0.0032   | 0.69 | 0.0003   | 0.71 |
| 29 |  | 2401.83 | H5N4F1L1E1 | 1.78 | 0.52 | 1.34 | 0.46 | 2.16 | 1.00 | 0.1110   | 0.59 | 7.16E-05 | 0.76 | 2.36E-06 | 0.78 |
| 30 |  | 2429.86 | H4N7E1     | 2.34 | 0.52 | 2.49 | 0.59 | 2.48 | 0.84 | 0.7950   | 0.52 | 0.4034   | 0.55 | 0.7484   | 0.52 |
| 31 |  | 2447.88 | H5N4F1E2   | 1.28 | 0.37 | 0.94 | 0.27 | 1.20 | 0.35 | 0.3508   | 0.56 | 7.16E-05 | 0.76 | 0.0006   | 0.70 |
| 32 |  | 2493.86 | H6N5F1E1   | 1.01 | 0.18 | 0.85 | 0.17 | 1.03 | 0.27 | 0.8886   | 0.51 | 0.0003   | 0.73 | 0.0005   | 0.70 |
| 33 |  | 2504.88 | H5N5E2     | 2.17 | 0.96 | 1.62 | 0.32 | 2.31 | 0.71 | 0.0899   | 0.60 | 1.51E-05 | 0.78 | 6.62E-07 | 0.80 |
| 34 |  | 2574.80 | H6N5L2     | 0.98 | 0.23 | 0.89 | 0.20 | 1.05 | 0.34 | 0.5330   | 0.54 | 0.0815   | 0.61 | 0.0251   | 0.63 |

## Screening and diagnosis of colorectal cancer and advanced adenoma

|    |                                                                                     |         |            |      |      |      |      |      |      |        |      |          |      |          |      |
|----|-------------------------------------------------------------------------------------|---------|------------|------|------|------|------|------|------|--------|------|----------|------|----------|------|
| 35 | 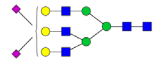   | 2620.90 | H6N5L1E1   | 0.84 | 0.30 | 0.67 | 0.23 | 1.03 | 0.48 | 0.0271 | 0.63 | 0.0077   | 0.67 | 2.94E-05 | 0.75 |
| 36 |    | 2650.95 | H5N5F1E2   | 1.89 | 0.58 | 1.37 | 0.44 | 1.84 | 0.70 | 0.8597 | 0.48 | 7.45E-05 | 0.75 | 0.0004   | 0.71 |
| 37 |    | 2666.93 | H6N5E2     | 0.96 | 0.34 | 0.73 | 0.22 | 1.25 | 0.63 | 0.0157 | 0.64 | 0.0027   | 0.69 | 3.43E-06 | 0.77 |
| 38 |    | 2766.94 | H6N5F1L1E1 | 1.17 | 0.50 | 0.89 | 0.30 | 1.71 | 0.97 | 0.0026 | 0.67 | 0.0159   | 0.65 | 1.92E-06 | 0.78 |
| 39 |    | 2813.09 | H6N5F1E2   | 0.95 | 0.42 | 0.73 | 0.27 | 1.11 | 0.60 | 0.2690 | 0.57 | 0.0210   | 0.65 | 0.0002   | 0.72 |
| 40 |    | 2893.96 | H6N5L2E1   | 0.92 | 0.37 | 0.77 | 0.29 | 1.15 | 0.61 | 0.0499 | 0.61 | 0.0660   | 0.62 | 0.0004   | 0.71 |
| 41 |    | 2940.05 | H6N5L1E2   | 0.92 | 0.26 | 0.81 | 0.24 | 1.04 | 0.38 | 0.0965 | 0.60 | 0.0403   | 0.63 | 0.0011   | 0.69 |
| 42 |    | 2986.07 | H6N5E3     | 1.22 | 0.37 | 1.02 | 0.30 | 1.70 | 0.71 | 0.0003 | 0.71 | 0.0213   | 0.65 | 4.02E-07 | 0.81 |
| 43 |    | 3040.03 | H6N5F1L2E1 | 1.24 | 0.50 | 1.01 | 0.44 | 1.89 | 1.02 | 0.0004 | 0.70 | 0.0225   | 0.64 | 1.30E-06 | 0.79 |
| 44 |    | 3068.16 | H5N5L1E1   | 2.02 | 0.79 | 1.83 | 0.86 | 2.72 | 1.31 | 0.0036 | 0.66 | 0.2164   | 0.58 | 0.0002   | 0.72 |
| 45 |    | 3086.09 | H6N5F1L1E2 | 0.86 | 0.42 | 0.67 | 0.38 | 1.25 | 0.66 | 0.0026 | 0.67 | 0.0268   | 0.64 | 3.43E-06 | 0.77 |
| 46 |   | 3259.12 | H7N6L2E1   | 0.71 | 0.30 | 0.62 | 0.29 | 0.97 | 0.60 | 0.0164 | 0.64 | 0.1014   | 0.60 | 0.0004   | 0.71 |
| 47 |  | 3305.23 | H7N6L1E2   | 0.93 | 0.35 | 0.91 | 0.37 | 1.33 | 0.74 | 0.0004 | 0.70 | 0.7883   | 0.48 | 0.0006   | 0.70 |
| 48 |  | 3532.34 | H7N6L3E1   | 0.75 | 0.40 | 0.69 | 0.33 | 0.98 | 0.59 | 0.0264 | 0.63 | 0.6958   | 0.53 | 0.0061   | 0.66 |
| 49 |  | 3578.28 | H7N6L2E2   | 0.70 | 0.33 | 0.74 | 0.30 | 1.04 | 0.61 | 0.0006 | 0.69 | 0.4941   | 0.54 | 0.0064   | 0.66 |

CRC, colorectal cancer; AA, advanced adenomas; H = hexose, N = N-acetylhexosamine, F = fucose, L = lactonized N-acetylneuraminic acid ( $\alpha$ 2,3-linked), E = ethyl esterified N-acetylneuraminic acid ( $\alpha$ 2,6-linked), the number of residues given listed the letter. Green circle, Man; yellow circle, Gal; blue square, GlcNAc; red triangle, Fuc; clockwise purple diamond,  $\alpha$ (2,6)-linked sialic acid; anticlockwise purple diamond,  $\alpha$ (2,3)-linked sialic acid.

## Screening and diagnosis of colorectal cancer and advanced adenoma

**Table S4.** Results of the *K-means* classifier

| Cluster 1: |                                                                                     |                        |                           |             |
|------------|-------------------------------------------------------------------------------------|------------------------|---------------------------|-------------|
| No         | Putative structure                                                                  | MW (M+Na) <sup>+</sup> |                           | composition |
|            |                                                                                     | Sample (light)         | Internal Standard (heavy) |             |
| G2         |    | 1282.47                | 1285.48                   | H3N3F1      |
| G4         |    | 1419.48                | 1422.49                   | H6N2        |
| G12        |    | 1688.62                | 1691.66                   | H3N5F1      |
| G17        |    | 1905.64                | 1908.68                   | H9N2        |
| G30        |    | 2429.86                | 2432.86                   | H4N7E1      |
| G33        |    | 2504.88                | 2507.89                   | H5N5E2      |
| G44        |    | 3068.16                | 3071.20                   | H5N5L1E1    |
| Cluster 2: |                                                                                     |                        |                           |             |
| No         | Putative structure                                                                  | MW (M+Na) <sup>+</sup> |                           | composition |
|            |                                                                                     | Sample (light)         | Internal Standard (heavy) |             |
| G1         |   | 1257.44                | 1260.45                   | H5N2        |
| G3         |  | 1298.46                | 1301.49                   | H4N3        |
| G5         |  | 1444.52                | 1447.55                   | H4N3F1      |
| G6         |  | 1455.53                | 1458.54                   | H3N3E1      |
| G7         |  | 1485.55                | 1488.57                   | H3N4F1      |
| G8         |  | 1501.53                | 1504.55                   | H4N4        |
| G9         |  | 1617.60                | 1620.61                   | H4N3E1      |
| G10        |  | 1647.61                | 1650.63                   | H4N4F1      |
| G11        |  | 1663.59                | 1666.61                   | H5N4        |
| G13        |  | 1779.70                | 1782.70                   | H5N3E1      |
| G16        |  | 1850.69                | 1853.69                   | H4N5F1      |
| G19        |  | 1966.74                | 1969.75                   | H4N4F1E1    |
| G23        |  | 2185.78                | 2188.79                   | H5N5E1      |
| G26        |  | 2301.85                | 2304.88                   | H5N4E2      |

## Screening and diagnosis of colorectal cancer and advanced adenoma

|     |                                                                                   |         |         |            |
|-----|-----------------------------------------------------------------------------------|---------|---------|------------|
| G27 |  | 2331.84 | 2334.86 | H5N5F1E1   |
| G28 |  | 2347.83 | 2350.84 | H6N5E1     |
| G29 |  | 2401.83 | 2404.86 | H5N4F1L1E1 |
| G36 |  | 2650.95 | 2653.97 | H5N5F1E2   |
| G42 |  | 2986.07 | 2989.08 | H6N5E3     |
| G43 |  | 3040.03 | 2043.07 | H6N5F1L2E1 |

Cluster 3:

| No  | Putative structure                                                                  | MW (M+Na) <sup>+</sup> |                           | composition |
|-----|-------------------------------------------------------------------------------------|------------------------|---------------------------|-------------|
|     |                                                                                     | Sample (light)         | Internal Standard (heavy) |             |
| G14 | 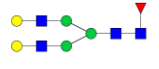   | 1809.67                | 1812.69                   | H5N4F1      |
| G15 |    | 1820.70                | 1823.70                   | H4N4E1      |
| G18 |    | 1936.69                | 1939.74                   | H5N4L1      |
| G20 |   | 1982.73                | 1985.76                   | H5N4E1      |
| G21 |  | 2012.75                | 2015.76                   | H5N5F1      |
| G22 |  | 2128.78                | 2131.80                   | H5N4F1E1    |
| G24 |  | 2209.74                | 2212.79                   | H5N4L2      |
| G25 |  | 2255.81                | 2258.83                   | H5N4L1E1    |
| G31 |  | 2447.88                | 2450.90                   | H5N4F1E2    |
| G32 |  | 2493.86                | 2496.93                   | H6N5F1E1    |
| G34 |  | 2574.80                | 2577.83                   | H6N5L2      |
| G35 |  | 2620.90                | 2623.91                   | H6N5L1E1    |
| G37 |  | 2666.93                | 2669.96                   | H6N5E2      |
| G38 |  | 2766.94                | 2769.95                   | H6N5F1L1E1  |
| G39 |  | 2813.09                | 2816.11                   | H6N5F1E2    |
| G40 |  | 2893.96                | 2897.01                   | H6N5L2E1    |



## Screening and diagnosis of colorectal cancer and advanced adenoma

|     |                                                                                   |         |         |            |
|-----|-----------------------------------------------------------------------------------|---------|---------|------------|
| G41 | 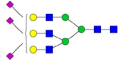 | 2940.05 | 2943.06 | H6N5L1E2   |
| G45 |  | 3086.09 | 3089.11 | H6N5F1L1E2 |
| G46 |  | 3259.12 | 3262.18 | H7N6L2E1   |
| G47 |  | 3305.23 | 3308.20 | H7N6L1E2   |
| G48 |  | 3532.34 | 3535.34 | H7N6L3E1   |
| G49 |  | 3578.28 | 3581.30 | H7N6L2E2   |

H = hexose, N = N-acetylhexosamine, F = fucose, L = lactonized N-acetylneuraminic acid ( $\alpha$ 2,3-linked), E = ethyl esterified N-acetylneuraminic acid ( $\alpha$ 2,6-linked), the number of residues given listed the letter. Green circle, Man; yellow circle, Gal; blue square, GlcNAc; red triangle, Fuc; clockwise purple diamond,  $\alpha$ (2,6)-linked sialic acid; anticlockwise purple diamond,  $\alpha$ (2,3)-linked sialic acid.

## Screening and diagnosis of colorectal cancer and advanced adenoma

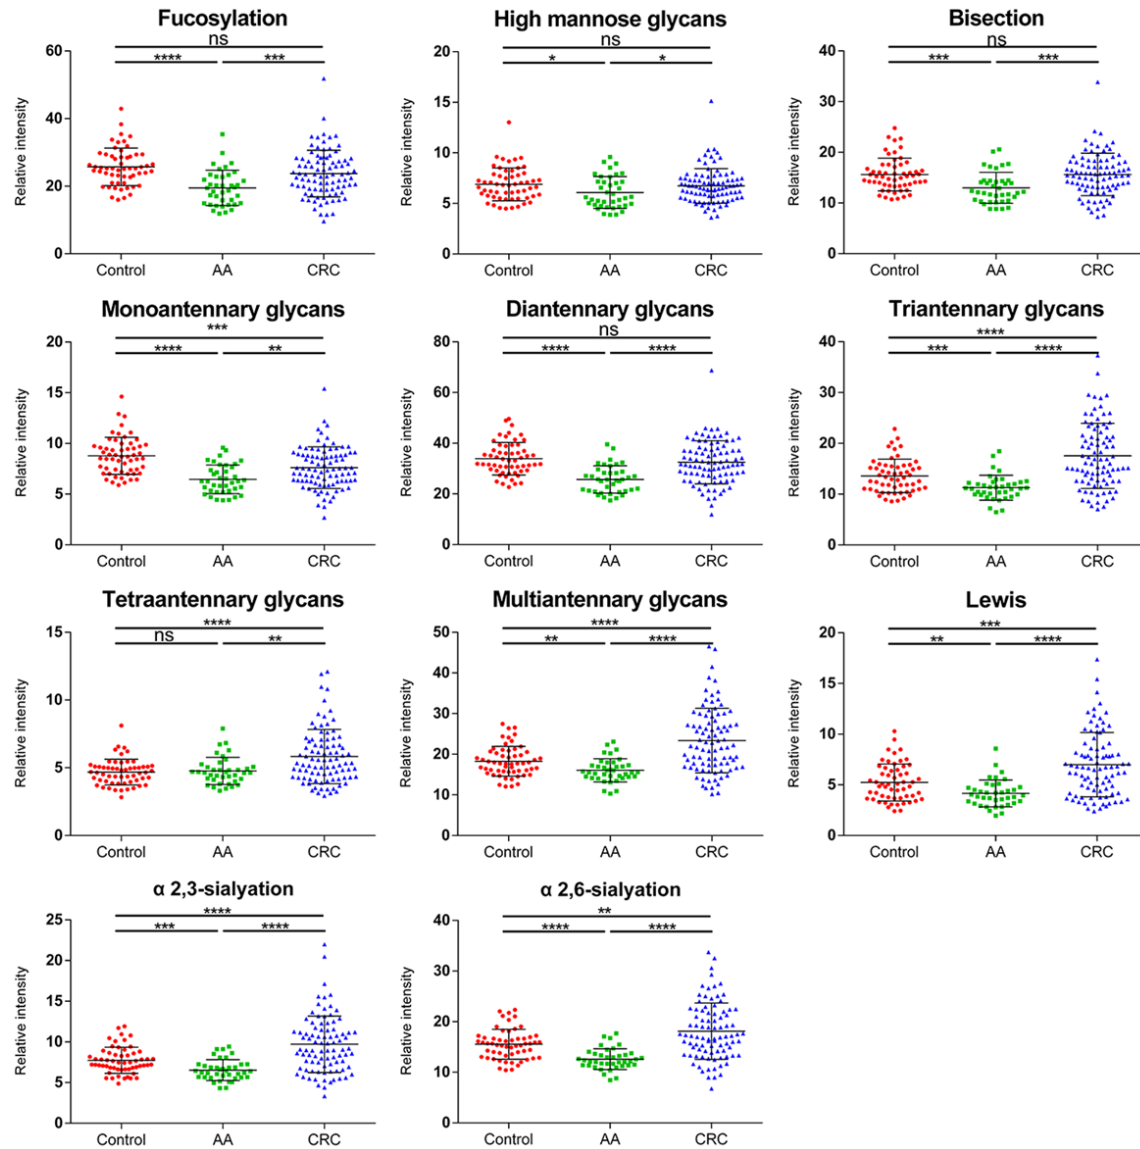

**Figure S1.** Scatter plot depicting the different relative intensity of derived glycosylation traits in the three groups. The N-glycans were grouped according to their structural features: fucosylation; high mannose glycans; bisecting type N-glycans; monoantennary; diantennary; triantennary; tetraantennary; α2,3-sialylation; α2,6-sialylation. \* The equivalent of  $P < 0.05$ , \*\* the equivalent of  $P < 0.01$ , \*\*\* the equivalent of  $P < 0.001$ , \*\*\*\* the equivalent of  $P < 0.0001$ .

## Screening and diagnosis of colorectal cancer and advanced adenoma

**Table S5.** N-glycan summary of the AUC above 0.8

| Number | Group       | Composition | AUC    |
|--------|-------------|-------------|--------|
| G3     | AA/Control  | H4N3        | 0.8061 |
| G5     | AA/Control  | H4N3F1      | 0.8241 |
| G8     | AA/Control  | H4N4        | 0.8169 |
| G9     | AA/Control  | H4N3E1      | 0.8187 |
| G11    | AA/Control  | H5N4        | 0.8309 |
| G14    | AA/Control  | H5N4F1      | 0.8088 |
| G15    | AA/Control  | H4N4E1      | 0.8493 |
| G19    | AA/Control  | H4N4F1E1    | 0.8084 |
| G20    | AA/Control  | H5N4E1      | 0.8313 |
| G22    | AA/Control  | H5N4F1E1    | 0.834  |
| G5     | CRC/Control | H4N3F1      | 0.8138 |
| G14    | CRC/Control | H5N4F1      | 0.8513 |
| G9     | AA/CRC      | H4N3E1      | 0.8203 |
| G20    | AA/CRC      | H5N4E1      | 0.8186 |
| G26    | AA/CRC      | H5N4E2      | 0.8164 |
| G33    | AA/CRC      | H5N5E2      | 0.8017 |
| G42    | AA/CRC      | H6N5E3      | 0.8119 |

CRC, colorectal cancer; AA, advanced adenomas; Control, healthy controls; H = hexose, N = N-acetylhexosamine, F = fucose, L = lactonized N-acetylneuraminic acid ( $\alpha$ 2,3-linked), E = ethyl esterified N-acetylneuraminic acid ( $\alpha$ 2,6-linked), the number of residues given listed the letter. Green circle, Man; yellow circle, Gal; blue square, GlcNAc; red triangle, Fuc; clockwise purple diamond,  $\alpha$ (2,6)-linked sialic acid; anticlockwise purple diamond,  $\alpha$ (2,3)-linked sialic acid.

# Screening and diagnosis of colorectal cancer and advanced adenoma

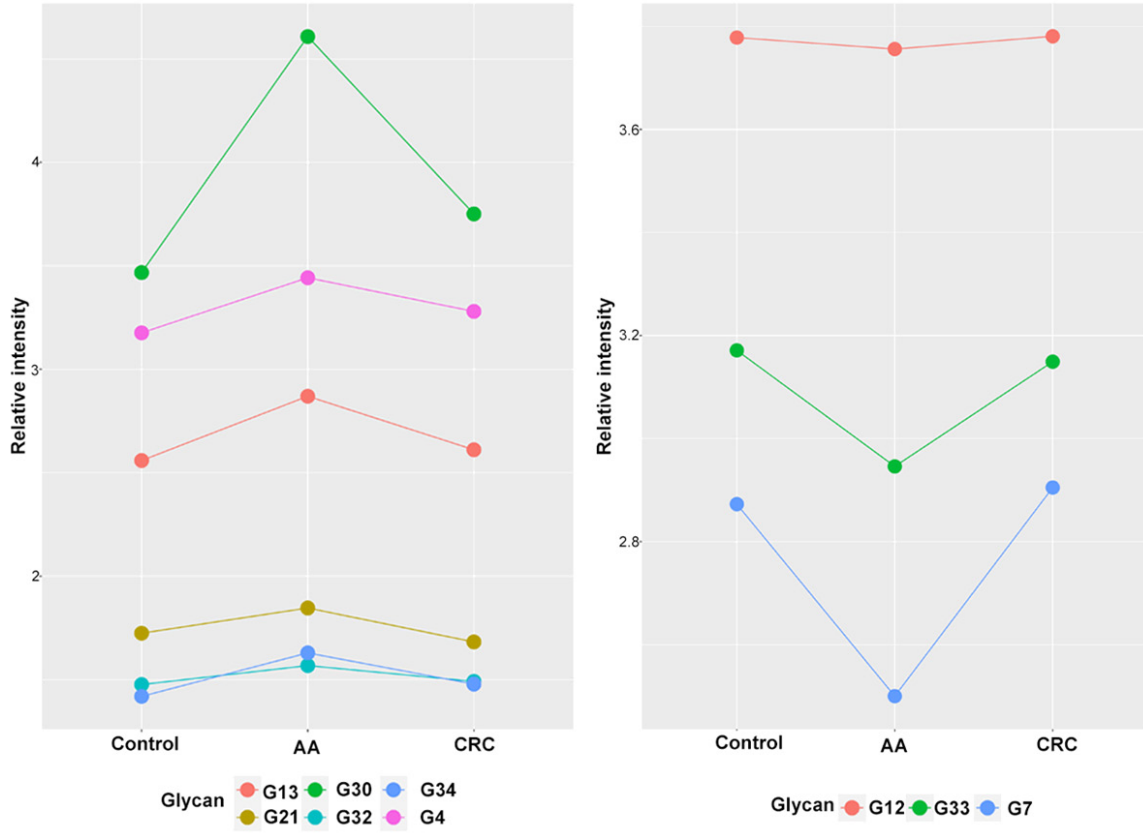

**Figure S2.** The N-glycans whose relative contents are not linearly correlated with the progression of the CRC.
